## Preferences and Acceptability for Long-Acting PrEP Agents Among Pregnant and Postpartum Women with Experience Using Daily Oral PrEP in South Africa and Kenya

**Authors:** Nafisa J. Wara<sup>1§</sup>, Rufaro Mvududu<sup>2</sup>, Mary M. Marwa<sup>3</sup>, Laurén Gómez<sup>4</sup>, Nyiko Mashele<sup>2</sup>, Catherine Orrell<sup>5</sup>, Corrina Moucheraud<sup>6</sup>, John Kinuthia<sup>3,4</sup>, Grace John-Stewart<sup>4,7,8,9</sup>, Landon Myer<sup>2</sup>, Risa Hoffman<sup>10</sup>, Jillian Pintye<sup>4,11</sup>, Dvora L. Joseph Davey<sup>2,10,12</sup>

### Affiliations:

<sup>1</sup>David Geffen School of Medicine at the University of California, Los Angeles, Los Angeles, California, USA

<sup>2</sup>Division of Epidemiology and Biostatistics, School of Public Health, University of Cape Town, Cape Town, South Africa

<sup>3</sup>Department of Research and Programs, Kenyatta National Hospital, Nairobi, Kenya

<sup>4</sup>Department of Global Health, University of Washington, Seattle, Washington, USA

<sup>5</sup>Desmond Tutu HIV Centre, Institute of Infectious Disease and Molecular Medicine and the Department of Medicine, University of Cape Town, South Africa

<sup>6</sup>Department of Health Policy and Management, Fielding School of Public Health, University of California Los Angeles, Los Angeles, California, USA

<sup>7</sup>Department of Epidemiology, University of Washington, Seattle, Washington, USA

<sup>8</sup>Department of Medicine, University of Washington, Seattle, Washington, USA

<sup>9</sup>Department of Pediatrics, University of Washington, Seattle, Washington, USA

<sup>10</sup>Division of Infectious Diseases, David Geffen School of Medicine at the University of California, Los Angeles, Los Angeles, California, USA

<sup>11</sup>Department of Biobehavioral Nursing and Health Informatics, University of Washington, Seattle, Washington, USA

<sup>12</sup>Department of Epidemiology, Fielding School of Public Health, University of California Los Angeles, Los Angeles, California, USA

### Correspondence:

Nafisa Wara

Email: [nwara@mednet.ucla.edu](mailto:nwara@mednet.ucla.edu)

Telephone: 518-577-3170

Address: 10833 Le Conte Ave, Los Angeles CA 90095

**Keywords:** PrEP, long-acting, pregnancy, breastfeeding, South Africa, Kenya

### Email addresses of authors:

NJW: [nwara@mednet.ucla.edu](mailto:nwara@mednet.ucla.edu)

RM: [rufaro.mvududu@uct.ac.za](mailto:rufaro.mvududu@uct.ac.za)

MMM: [mmarwa@uw.edu](mailto:mmarwa@uw.edu)

LG: [gomezl4@uw.edu](mailto:gomezl4@uw.edu)

NM: [nyiko.mashele@uct.ac.za](mailto:nyiko.mashele@uct.ac.za)

CO: [Catherine.orrell@hiv-research.org.za](mailto:Catherine.orrell@hiv-research.org.za)

CM: [cmoucheraud@g.ucla.edu](mailto:cmoucheraud@g.ucla.edu)

JK: [kinuthia@uw.edu](mailto:kinuthia@uw.edu)

GJ-S: [gjohn@uw.edu](mailto:gjohn@uw.edu)

LM: [landon.myer@uct.ac.za](mailto:landon.myer@uct.ac.za)

RH: [rhoffman@mednet.ucla.edu](mailto:rhoffman@mednet.ucla.edu)

JP: [jpintye@uw.edu](mailto:jpintye@uw.edu)

DLJD: [dvora.josephdavey@uct.ac.za](mailto:dvora.josephdavey@uct.ac.za)

1 **Abstract**

2

3 **Introduction:** Long-acting pre-exposure prophylaxis (PrEP) options could overcome some barriers to oral  
4 PrEP persistence during pregnancy and postpartum. We evaluated long-acting PrEP preferences among  
5 oral PrEP-experienced pregnant and postpartum women in South Africa and Kenya, two countries with  
6 high coverage of oral PrEP and with pending regulatory approvals for long-acting injectable cabotegravir  
7 and the dapivirine vaginal ring (approved in South Africa, under review in Kenya).

8

9 **Methods:** From September 2021 to February 2022, we surveyed pregnant and postpartum women  
10 enrolled in oral PrEP studies in South Africa and Kenya. We evaluated oral PrEP attitudes and preferences  
11 for existing and future long-acting PrEP methods.

12

13 **Results:** We surveyed 190 women in South Africa (67% postpartum; median age 27 years [IQR 22-32]) and  
14 204 women in Kenya (79% postpartum; median age 29 years [IQR 25-33]). 75% of participants reported  
15 oral PrEP use within the last 30 days. Overall, 49% of participants reported negative oral PrEP attributes,  
16 including side effects (21% South Africa, 30% Kenya) and pill burden (20% South Africa, 25% Kenya).  
17 Preferred PrEP attributes included long-acting method, effectiveness, safety while pregnant and  
18 breastfeeding, and free medication. Most participants (75%, South Africa and Kenya) preferred a potential  
19 long-acting injectable over oral PrEP, most frequently for longer duration of effectiveness in South Africa  
20 (87% South Africa, 42% Kenya) versus discretion in Kenya (5% South Africa, 49% Kenya). 87% of participants  
21 preferred oral PrEP over a potential long-acting vaginal ring, mostly due to concern about possible  
22 discomfort with vaginal insertion (82% South Africa, 48% Kenya). Significant predictors of long-acting PrEP  
23 preference included past use of injectable contraceptive (aOR 2.48, 95% CI: 1.34, 4.57), disliking at least  
24 one oral PrEP attribute (aOR 1.72, 95% CI: 1.05, 2.80), and preferring infrequent PrEP use (aOR 1.58, 95%  
25 CI: 0.94, 2.65).

26

27 **Conclusions:** Oral PrEP-experienced pregnant and postpartum women expressed a theoretical preference  
28 for long-acting injectable PrEP over other modalities, demonstrating potential acceptability among a key  
29 population who must be at the forefront of injectable PrEP rollout. Reasons for PrEP preferences differed  
30 by country, emphasizing the importance of increasing context-specific options and choice of PrEP  
31 modalities for pregnant and postpartum women.

## 32 Introduction

33 HIV incidence remains high among cisgender women of reproductive age in South Africa and Kenya,  
34 including during pregnancy and postpartum[1-4]. Pregnant women without HIV are at elevated risk of  
35 acquisition due to structural and sociocultural factors (e.g., poverty, gender inequity) that may result in  
36 high-risk scenarios, including not knowing the HIV status of their partner(s), engaging in sexual activity  
37 without condoms, and having multiple sex partners[5-8]. Furthermore, the risk of vertical HIV transmission  
38 is elevated during pregnancy and breastfeeding due to acute maternal HIV infection[9,10]. A concerted  
39 effort is needed to reduce HIV infections among pregnant and breastfeeding individuals, and their infants.

40 Daily oral tenofovir disoproxil fumarate/emtricitabine (TDF/FTC) pre-exposure prophylaxis (PrEP) for HIV  
41 prevention is being rapidly scaled in South Africa and Kenya, and these two countries have the highest and  
42 second highest number of PrEP initiations globally[11]. Studies have reported high rates of oral PrEP  
43 uptake among pregnant and postpartum women in South Africa and Kenya[12,13]. However, the delivery  
44 of daily oral PrEP among pregnant and postpartum women is challenged by insufficient integration of PrEP  
45 provision and counseling into existing antenatal and postpartum systems[14]. Furthermore, self-reported  
46 adherence on oral PrEP (e.g., taking PrEP daily) was low among pregnant and postpartum women in Kenya,  
47 and limited adherence was identified among pregnant and postpartum women taking oral PrEP in South  
48 Africa through dried blood spot analysis[13,15]. Substantial barriers to oral PrEP adherence exist in these  
49 populations, including pill burden, stigma and limited disclosure of PrEP use, and financial and logistical  
50 barriers to accessing a clinic for PrEP[16-18]. Strategies to overcome barriers to PrEP adherence are  
51 urgently needed.

52 Long-acting modalities, such as injectable cabotegravir (CAB-LA) and the dapivirine vaginal ring, may  
53 improve PrEP initiation and persistence among pregnant and postpartum women. CAB-LA, an  
54 intramuscular injection administered every eight weeks, is superior to oral PrEP, reducing risk of HIV  
55 infection by 88% compared to daily oral TDF/FTC among cisgender women in Sub-Saharan Africa[19].  
56 Preliminary data show that CAB-LA is well tolerated during pregnancy and has a similar pharmacokinetic  
57 profile to its use by nonpregnant women[20,21]. CAB-LA received regulatory approval in the United States  
58 in December 2021 and is pending regulatory approval in South Africa, Kenya, and other countries in  
59 Southern Africa[11]. The dapivirine ring, inserted vaginally and replaced every four weeks, has been shown  
60 to reduce the risk of HIV infection by approximately 30% and is not associated with adverse pregnancy or  
61 infant outcomes[22]. The dapivirine ring received regulatory approval in South Africa in March 2022, and is  
62 pending approval in Kenya[11]. These developments highlight the urgent need to understand potential  
63 facilitators and barriers to uptake and persistence on these novel PrEP methods among pregnant and

64 postpartum women. Our study aims to assess preferences for and perceptions of long-acting PrEP methods  
65 among oral PrEP-experienced pregnant and postpartum women in Kenya and South Africa.

66

## 67 **Methods**

68 **Study participants:** We conducted surveys with participants enrolled in an observational cohort study  
69 assessing daily oral PrEP initiation and persistence among pregnant and breastfeeding women (PBFW) in  
70 Cape Town, South Africa (PrEP-PP) and an observational extension cohort of a cluster randomized trial  
71 offering daily oral PrEP among PBFW in Western Kenya (PrIMA-X)[23,24]. Eligibility criteria for PrEP-PP  
72 included:  $\geq 16$  years old, confirmed HIV-negative serostatus by a 4<sup>th</sup> generation antigen/antibody  
73 combination HIV test (Abbott), intention to stay in Cape Town through the postpartum period, and no  
74 contraindications to PrEP use. Eligibility criteria for PrIMA-X included:  $\geq 15$  years old, confirmed HIV and TB  
75 negative, intention to reside in the area for at least one year postpartum, and plans to receive postnatal  
76 and infant care at the study facility. Enrolment criteria for this subsample included: currently using or  
77 having previously used daily oral PrEP; currently pregnant or  $\leq 9$  months postpartum; and enrolment in  
78 PrEP-PP or PrIMA-X.

79

80 **Data collection:** Between September 2021 and February 2022, trained study staff fluent in English and  
81 either isiXhosa, Kiswahili, or Luo approached women attending PrEP-PP or PrIMA-X follow-up visits to  
82 introduce the study. Study staff then screened participants for study eligibility, obtained written informed  
83 consent in English or the participant's local language (isiXhosa, Kiswahili, or Luo), and administered the  
84 survey to eligible consenting participants. Study staff asked participants survey questions and recorded  
85 responses on a tablet. The survey took 30-40 minutes and was completed on REDCap, a secure web-based  
86 platform[25]. Participants received 120 Rand in South Africa (~\$7 USD) or KSh 300 in Kenya (~\$3 USD) for  
87 their participation in the study as well as transportation expenses.

88

## 89 **Survey Measures:**

### 90 *Participant Sociodemographic Characteristics*

91 We collected (a) basic demographic data (including age, obstetric history, education level, employment,  
92 number of sexual partners), (b) HIV risk perception (response to "How would you describe your chances of  
93 getting HIV in the next year?" from "no chance at all" to "great chance"), (c) current alcohol use adapted  
94 from the Alcohol Use Disorders Identification Test[26,27], (d) PrEP adherence based on 30-day recall (i.e.

95 responding “yes” or “no” to taking PrEP within the past 30 days), (e) clinic access (including transportation  
96 method, total travel time, and total transportation cost), and (f) previous use of any contraceptive  
97 methods. We also assessed PrEP stigma using a seven-item scale derived from existing literature in which  
98 participants responded to statements describing experiences of PrEP stigma via a 5-point Likert scale  
99 ranging 0 = “strongly disagree” to 4 = “strongly agree”[28,29].

#### 100 *Current and Future PrEP Preferences*

101 We assessed perceptions of daily oral PrEP by asking participants what they like and dislike about oral PrEP.  
102 We described methods of long-acting HIV prevention currently pending regulatory approval or in  
103 development, and asked participants about preferences regarding HIV prevention modalities that may be  
104 available in the future. We adapted a list of PrEP characteristics from a discrete choice experiment of HIV  
105 prevention methods assessed within the Quatro Study[30]. We asked participants to rank the top three  
106 most important characteristics of a potential HIV prevention product, the top three most important access-  
107 related characteristics, and how frequently they would theoretically use an HIV prevention method.

#### 108 *Long-acting PrEP Preferences*

109 We assessed preferences regarding injectable PrEP and the vaginal ring by asking participants whether  
110 they would prefer to switch to the long-acting method or remain on oral PrEP. We then assessed reasons  
111 for preferring the long-acting method or oral PrEP.

112

113 **Statistical analyses:** We used descriptive statistics (median, interquartile range [IQR], frequency) to report  
114 participant responses, and used Chi-square, Fischer’s Exact, and Wilcoxon rank sum to compare responses  
115 between countries. We used univariate and multivariable logistic regression models to assess predictors of  
116 preferring a long-acting PrEP method (injection or ring) over oral PrEP (among those with this preference).  
117 We adjusted for *a priori* potential confounders (maternal age and country) in the multivariable models.  
118 Statistical analyses were conducted with STATA v.17[31].

119

120 **Ethics:** The PrEP-PP study was approved by the Human Research Ethics Committee of the University of  
121 Cape Town Faculty of Health Sciences (#297/2018) and by the University of California, Los Angeles  
122 Institutional Review Board (IRB#18-001622). The PrIMA-X study was approved by the Kenyatta National  
123 Hospital-University of Nairobi Ethics and Research Committee (P73/02/2017) and by the University of  
124 Washington Human Subjects Division (STUDY00000438).

125

## 126 Results

127 Overall, 394 women were enrolled in the study, 190 women from the South African cohort and 204 from  
128 the Kenyan cohort. Median ages were 27 (IQR=22-32) and 29 (IQR=25-33) respectively (**Table 1**). Overall,  
129 33% of South African participants were pregnant (n=63) while 21% of Kenyan participants were pregnant  
130 (n=42), with the remaining in both groups postpartum. Most participants completed some or all secondary  
131 school education (total n=326, 83%) although secondary education was more common in South Africa  
132 (93%, Kenya 74%, p<0.01). Unemployment was more common in Kenya (Kenya 87%, South Africa 72%,  
133 p<0.01). Almost all (95%) women reported having at least one current sexual partner (n=373). Most  
134 participants reported that they took at least one dose of PrEP over the previous 30 days at the time of the  
135 survey (South Africa 82%, Kenya 68%, p<0.001), and median time on PrEP among current PrEP users was  
136 337 days (IQR=263-420) and 308 days (IQR=114-442) among South African and Kenyan participants,  
137 respectively.

138 At entry into the parent study, 52% of South African women and 81% of Kenyan women reported any  
139 perceived risk of HIV acquisition (p<0.01). More than half endorsed no forms of PrEP stigma (66%,  
140 n=251/380), although more women in Kenya endorsed at least one form of PrEP stigma (Kenya 40%, South  
141 Africa 27%, p=0.01).

142 At the time of the survey, participants' median travel time to and from the clinic was 30 minutes (IQR=20-  
143 40) in South Africa and 55 minutes (IQR=31-60) in Kenya (p<0.01), and median cost to travel to and from  
144 the clinic was USD \$1.32 (IQR=1.32-1.32) and \$1.75 (IQR=0.88-2.64) respectively (p=0.01). When asked  
145 about any previous experience with contraceptives, women frequently described use of injectable  
146 contraceptives (South Africa 94% vs Kenya 66%, p<0.01), followed in South Africa by use of male condoms  
147 (n=171, 90%) and contraceptive implants (n=70, 37%). Among women in Kenya, injectable contraceptive  
148 was most common (n=134, 66%), followed by the contraceptive implant (n=111, 54%) and then male  
149 condoms (n=46, 23%).

150

## 151 Experiences with Oral PrEP

152 Almost all participants (n=386, 98%) reported efficacy in HIV prevention as a positive characteristic of daily  
153 oral PrEP, followed by daily oral PrEP having few or no side effects (n=61, 15%) and being easy to use  
154 (n=27, 7%) (**Table 2**). In addition, 10 (5%) participants in Kenya (compared to none in South Africa) liked  
155 that oral PrEP was discreet and 5 (2%) participants in South Africa (compared to none in Kenya) reported  
156 oral PrEP's safety during breastfeeding as a positive characteristic. Forty-two percent of women in South  
157 Africa (n=79) and 56% in Kenya (n=114, p<0.01) disliked at least one attribute about daily oral PrEP. The

158 most frequently reported dislikes included side effects (South Africa 21%, Kenya 30%,  $p=0.03$ ), daily use  
159 (South Africa 20%, Kenya 25%,  $p=0.20$ ), and taking it orally (South Africa 6%, Kenya 11%,  $p=0.08$ ).

160

### 161 **Future PrEP Preferences**

162 When asked to rank characteristics of a potential PrEP product that may be available to them in the future,  
163 52% of participants ( $n=203$ ) ranked effectiveness at preventing HIV as the most important, followed by the  
164 ability to have a healthy pregnancy ( $n=47$ , 12%), frequency of use ( $n=39$ , 10%), tolerability ( $n=39$ , 10%), and  
165 the ability to breastfeed and have a healthy baby ( $n=26$ , 7%). However, there were country-specific  
166 differences in the ranking of several attributes: more women in Kenya ranked HIV prevention highest (78%,  
167 South Africa 23%,  $p<0.01$ ), more women in South Africa ranked having a healthy pregnancy (19%, Kenya  
168 5%,  $p<0.01$ ), frequency of use (18%, Kenya 2%,  $p<0.01$ ), side effects (16%, Kenya 4%,  $p<0.01$ ), and privacy  
169 (6%, Kenya 1%,  $p=0.01$ ) as most important (**Table 3**). When asked to rank access-related characteristics of a  
170 potential PrEP product, 52% of participants ranked medication being free as the most important, followed  
171 by ease of the process by which the product is obtained, location, and total time it takes to get the  
172 product. When asked to rank preferred frequency of PrEP use, participants most frequently preferred once  
173 a year ( $n=123$ , 31%), followed by once per month ( $n=62$ , 16%), once every 2-3 months ( $n=59$ , 15%), before  
174 sex ( $n=53$ , 13%), every day ( $n=46$ , 12%), once every 6 months ( $n=45$ , 11%), and after sex ( $n=6$ , 2%). Kenyan  
175 women preferred PrEP use once every 6 months, or once every 2-3 months, whereas South African women  
176 preferred a product that could be used once a year ( $p<0.01$ ).

177

### 178 **Preference of long-acting PrEP modalities**

179 Overall, three-fourths of participants ( $n=297$ , South Africa 74%, Kenya 76%,  $p=0.60$ ) responded that they  
180 would prefer to switch to injectable PrEP over remaining on oral PrEP if it were available (**Figure 1**). South  
181 African and Kenyan women differed in their reasons for preferring injectable PrEP over oral PrEP:  
182 participants in South Africa more commonly preferred it for its longer duration of effectiveness (South  
183 Africa 87%, Kenya 42%,  $p<0.01$ ) and not having to take a daily pill (South Africa 57%, Kenya 41%,  $p<0.01$ ),  
184 while participants in Kenya were more likely to state reasons of privacy (Kenya 49%, South Africa 5%,  
185  $p<0.01$ ) and not having to carry pills (Kenya 42%, South Africa 13%,  $p<0.01$ ) (**Supplementary Table 1**). The  
186 most common concerns regarding injectable PrEP were injection pain and potential side effects. Although  
187 overall these concerns were not frequently reported, Kenyan participants were more concerned than  
188 South African participants regarding the safety of the new injectable (Kenya 13%, South Africa 4%,  $p=0.01$ )  
189 and its safety for infants if using the injectable while breastfeeding (Kenya 6%, South Africa 0%,  $p=0.01$ ).

190 Fewer women (n=40, 10%) would prefer switching to the vaginal ring over oral PrEP in both South Africa  
191 and Kenya (12% and 9% respectively). South African women were interested in the vaginal ring most  
192 frequently due to its longer duration (n=14/22, 64%) and not having to remember to take a daily pill  
193 (n=12/22, 55%), while most common reasons for preferring the vaginal ring in Kenya were because it was  
194 “easy to use” (n=8/18, 44%) or did not involve carrying pills (n=6/18, 33%). Participants were unsure or  
195 preferred oral PrEP over the vaginal ring most frequently due to its insertion into the vagina particularly  
196 among South African women (South Africa 82%, Kenya 48%,  $p<0.01$ ), potential side effects more so among  
197 Kenyan women (South Africa 21%, Kenya 33%,  $p=0.02$ ), and concerns about safety (South Africa 23%,  
198 Kenya 27%). Participants in South Africa were also more frequently concerned about the vaginal ring not  
199 providing sufficient protection against HIV (14%, Kenya 7%,  $p=0.03$ ).

200 In multivariable analyses adjusting for age and country, preference of a long-acting PrEP method (either  
201 injectable PrEP or vaginal ring) over daily oral PrEP was associated with prior use of injectable  
202 contraception (aOR=2.48, 95% CI=1.34, 4.57), disliking at least one attribute of daily oral PrEP (aOR=1.72,  
203 95% CI=1.05, 2.80), disliking the daily use of oral PrEP (aOR=1.92, 95% CI=1.01, 3.67), and preferring longer  
204 duration of effectiveness (aOR=1.58, 95% CI=0.94, 2.65) (**Table 4**). Preferring a long-acting PrEP method  
205 over oral PrEP was negatively associated with previous use of the female condom (aOR=0.27, 95% CI=0.07,  
206 1.12) and liking taking oral PrEP daily (aOR 0.30, 95% CI=0.07, 1.24).

207

## 208 **Discussion**

209 We identified a strong theoretical preference for long-acting injectable PrEP among pregnant and  
210 postpartum women in Kenya and South Africa. Additionally, about one-half of women reported liking daily  
211 oral PrEP, indicating the importance of providing pregnant and postpartum women with choices of  
212 modalities. Studies assessing end-user preference among African women of potential HIV prevention  
213 methods (multiple vaginally inserted methods, injection, pill) showed that women had varied preference  
214 for these HIV prevention modalities, and women described the importance of personal preference in  
215 product choice[32-34]. Similar to HIV prevention, studies on contraceptive choice indicate that the best  
216 method for an individual depends on their preferences, necessitating a diversity of contraceptive  
217 options[35-37]. Our data suggest that the availability of choices to meet personal preferences is essential  
218 to improving overall uptake of HIV prevention methods among pregnant and postpartum women as well.  
219 Furthermore, women in South Africa and Kenya did not differ in preferences for long-acting PrEP  
220 modalities compared to oral PrEP, but did differ in the reasoning behind their preferences, indicating the  
221 importance of context-specific implementation when providing HIV prevention modalities.  
222 Sociodemographic characteristics and available PrEP modalities differ between countries, indicating that



223 differences between countries in PrEP preferences among pregnant and postpartum women need to be  
224 studied and incorporated into country-specific plans for PrEP rollout.

225 Our findings on preference for long-acting injectable PrEP among pregnant and postpartum women, as  
226 well as most reasons for their PrEP preferences, align with the existing literature among nonpregnant  
227 women. Women also noted need for safety data in pregnancy and lactation in our study, which was  
228 distinct for this population. In studies providing hypothetical choices between long-acting PrEP modalities,  
229 nonpregnant women from Kenya and South Africa preferred injectable methods of HIV prevention over  
230 other modalities, despite similar concerns regarding injection pain[38-40]. In studies assessing acceptability  
231 of long-acting injectable PrEP among women within clinical trials in Africa and the United States,  
232 participants described acceptability of long-acting injectable PrEP due to its ease of use and long-term  
233 protection and would use the method again[41-43], which may suggest that hypothetical acceptability of  
234 long-acting injectable PrEP among pregnant and postpartum women may align with its acceptability  
235 among nonpregnant women during implementation. Some PrEP preferences identified by women in our  
236 study were specific to the pregnancy-postpartum period, such as the importance of safety in pregnancy  
237 and infant safety while breastfeeding on PrEP. Previous data have identified the positive impacts of  
238 counseling about infant safety on oral PrEP initiation among women in Kenya, highlighting that obtaining  
239 further data on pregnancy outcomes and infant safety of CAB-LA, as well as counseling on safety may be  
240 beneficial for uptake[18].

241 Pregnant and postpartum women in our study reported that they would prefer to use a long-acting  
242 injectable PrEP for privacy and discreetness of this method, highlighting the role of long-acting PrEP to  
243 mitigate sociocultural barriers previously identified with oral PrEP use[16-18,44]. Qualitative studies in  
244 Kenya and South Africa have described the negative community perception surrounding PrEP use  
245 experienced by pregnant and nonpregnant women, particularly due to its association with high-risk sexual  
246 behavior as well as being conflated with antiretroviral therapy, leading to concealment of product use[45-  
247 47]. A qualitative study assessing oral PrEP perceptions among pregnant and postpartum women in Kenya  
248 additionally described fear of male partners becoming violent if discovering their PrEP use, indicating that  
249 stigma and negative sentiments towards PrEP within a household may decrease PrEP disclosure and  
250 necessitate concealment[48,49]. The availability of a HIV prevention method, such as long-acting injectable  
251 PrEP, that does not require daily administration or concealment of physical pills may make it easier for  
252 pregnant and postpartum women experiencing PrEP stigma to persist on the HIV prevention method – and  
253 has been hypothetically posed by women as a potential solution in previous qualitative work[47]. Long-  
254 acting PrEP modalities must be made available in conjunction to other solutions that mitigate community-  
255 and individual-level stigma experienced by women in Kenya and South Africa, such as community-facing

256 interventions involving media and educational initiatives, as well as the involving of male partners in HIV  
257 prevention and education[41,50].

258 Few pregnant and postpartum women reported preference for the PrEP vaginal ring over oral PrEP, which  
259 may be due to unfamiliarity with the method as well as its lower efficacy. Existing acceptability and  
260 demonstration studies of the dapivirine ring for HIV prevention show that despite similar initial concerns  
261 regarding insertion into the vagina and potential side effects, women in Sub-Saharan Africa who began  
262 using vaginal rings for HIV prevention developed familiarity with the method, found it easy to integrate  
263 into their lives, and reported willingness to use the method in the future[51-54]. Our data in the context of  
264 these studies indicate the importance of education regarding vaginal ring insertion and anticipated side  
265 effects when counseling about available HIV prevention modalities, and reemphasize the need for  
266 available choice in HIV prevention methods that can be used individually or in combination.

267 Prior use of injectable contraception was associated with a preference for injectable PrEP, indicating that  
268 contraceptive knowledge and familiarity with the concept of regular injections as a prevention measure  
269 may impact uptake of injectable PrEP among pregnant and postpartum women. Studies assessing  
270 acceptability of multipurpose prevention technologies combining HIV and pregnancy prevention similarly  
271 showed that injections were preferred compared to a ring or pill-form of combination prevention, and that  
272 past experience with similar contraceptive delivery forms was a significant predictor of their method  
273 choice[55-57]. Combining HIV prevention education with family planning education may improve uptake of  
274 HIV prevention, due to existing familiarity with long-acting contraceptive modalities. Further, the future  
275 development of combination prevention methods may improve uptake of HIV prevention.

#### 276 *Limitations*

277 Our study included pregnant and postpartum women with knowledge and experience with oral PrEP. As  
278 such, our results may differ from preferences of pregnant and postpartum women without prior  
279 experience using PrEP. Our surveys provided a hypothetical choice between PrEP modalities, as some  
280 methods are not yet available in South Africa and Kenya (i.e. injectable PrEP in both countries, vaginal ring  
281 PrEP in Kenya). Responses may differ from PrEP choices during an implementation offering multiple  
282 modalities. Our results may not be generalizable to other settings beyond urban South Africa and Kenya, so  
283 further study is necessary on the acceptability of long-acting PrEP among pregnant and postpartum  
284 women in other settings.

285

#### 286 **Conclusions**

287 Our study demonstrates that pregnant and postpartum women on oral PrEP may desire a switch to long-  
288 acting injectable PrEP as it becomes available in South Africa and Kenya. Women in our study had different  
289 PrEP preferences and different reasons for these preferences, indicating the need for client-centered PrEP  
290 programs that offer diverse choices for HIV prevention and empower women to make the choice best  
291 suited to their needs and lifestyle. Some of these preferences, such as safety for maternal-infant dyad,  
292 were specific to the pregnant-postpartum period, while others likely reflected general preferences of  
293 women about PrEP. Overall, further efforts are needed to increase choice and accessibility of various PrEP  
294 options to benefit the well-being of pregnant and postpartum women and their infants.

295

#### 296 **Conflict of Interest Statement**

297 The PrEP-PP study received the study drug (Truvada®) from Gilead Sciences (Foster City, CA, USA).

298

#### 299 **Authorship**

300 Study was conceived by NJW and designed by NJW, RH, JP, DLJD. NJW oversaw study implementation and  
301 data collection, analyzed the data, wrote the first draft of manuscript, and reviewed the manuscript  
302 following revision by all co-authors. RM, MM, LG, and NM reviewed the study design, oversaw study  
303 implementation and data collection, and assisted with data analysis. CO, CM, RH, JP, and DLJD reviewed  
304 the study design, study data, and data analysis. JK, GJ-S, and JP designed the PRIMA-X study, and LM and  
305 DLJD designed the PrEP-PP study. All authors contributed to the development of this manuscript, and have  
306 read and approved the final manuscript.

307

#### 308 **Acknowledgments**

309 We would like to thank all PrEP-PP and PrIMA-X study participants for their time and perspectives, as well  
310 as the PrEP-PP and PrIMA-X project staff, the City of Cape Town Department of Health, Kenyan Ministry of  
311 Health, and Siaya and Homa Bay County Governments.

312

#### 313 **Funding**

314 This work was funded by the National Institute of Mental Health: R01MH116771 (DJD, LM), The Eunice  
315 Kennedy Shriver National Institute of Child Health and Human Development: 1R01HD106821 (DJD)  
316 R01HD100201 (JP), the Fogarty International Center: K01TW011187 (DJD), the National Institute of Nursing  
317 Research: R01NR019220 (JP and JK) and the National Institutes of Allergy and Infectious Diseases:  
318 R01AI125498 (GJS). The PrEP-PP study received the study drug (Truvada®) from Gilead Sciences (Foster  
319 City, CA, USA).

## References

1. UNAIDS. (n.d.). Start Free Stay Free AIDS Free - 2020 Progress Report. [https://www.unaids.org/sites/default/files/media\\_asset/start-free-stay-free-aids-free-2020-progress-report\\_en.pdf](https://www.unaids.org/sites/default/files/media_asset/start-free-stay-free-aids-free-2020-progress-report_en.pdf)
2. Woldesenbet, S., Kufa-Chakezha, T., Lombard, C., Manda, S., Cheyip, M., Ayalew, K., Chirombo, B., Barron, P., Diallo, K., Parekh, B., & Puren, A. (2021). Recent HIV infection among pregnant women in the 2017 antenatal sentinel cross-sectional survey, South Africa: Assay-based incidence measurement. *PLoS One*, 16(4), e0249953. <https://doi.org/10.1371/journal.pone.0249953>
3. le Roux, S. M., Abrams, E. J., Nguyen, K. K., & Myer, L. (2019). HIV incidence during breastfeeding and mother-to-child transmission in Cape Town, South Africa. *AIDS (London, England)*, 33(8), 1399–1401. <https://doi.org/10.1097/QAD.0000000000002224>
4. Sirengo, M., Muthoni, L., Kellogg, T. A., Kim, A. A., Katana, A., Mwanjumba, S., Kimanga, D. O., Maina, W. K., Muraguri, N., Elly, B., Rutherford, G. W., & KAIS Study Group. (2014). Mother-to-child transmission of HIV in Kenya: results from a nationally representative study. *Journal of Acquired Immune Deficiency Syndromes (1999)*, 66 Suppl 1, S66-74. <https://doi.org/10.1097/QAI.0000000000000115>
5. Kharsany, A. B., Frohlich, J. A., Yende-Zuma, N., Mahlase, G., Samsunder, N., Dellar, R. C., Zuma-Mkhonza, M., Karim, S. S. A., & Karim, Q. A. (2015). Trends in HIV prevalence in pregnant women in rural South Africa. *Journal of Acquired Immune Deficiency Syndromes (1999)*, 70(3), 289–295. <https://doi.org/10.1097/QAI.0000000000000761>
6. Pettifor, A. E., Rees, H. V., Kleinschmidt, I., Steffenson, A. E., MacPhail, C., Hlongwa-Madikizela, L., Vermaak, K., & Padian, N. S. (2005). Young people's sexual health in South Africa: HIV prevalence and sexual behaviors from a nationally representative household survey. *AIDS (London, England)*, 19(14), 1525–1534. <https://doi.org/10.1097/01.aids.0000183129.16830.06>
7. Ryan, J. H., Young, A., Musara, P., Reddy, K., Macagna, N., Guma, V., Seyama, L., Piper, J., van der Straten, A., & MTN- 041/MAMMA Study Team. (2022). Sexual Attitudes, Beliefs, Practices, and HIV Risk During Pregnancy and Post-delivery: A Qualitative Study in Malawi, South Africa, Uganda, and Zimbabwe. *AIDS and Behavior*, 26(3), 996–1005. <https://doi.org/10.1007/s10461-021-03454-y>
8. Varga, C. A. (2003). How gender roles influence sexual and reproductive health among South African adolescents. *Studies in Family Planning*, 34(3), 160–172. <https://doi.org/10.1111/j.1728-4465.2003.00160.x>
9. Woldesenbet, S., Kufa-Chakezha, T., Lombard, C., Manda, S., Cheyip, M., Ayalew, K., Chirombo, B., Barron, P., Diallo, K., Parekh, B., & Puren, A. (2021). Recent HIV infection among pregnant women in the 2017 antenatal sentinel cross-sectional survey, South Africa: Assay-based incidence measurement. *PLoS One*, 16(4), e0249953. <https://doi.org/10.1371/journal.pone.0249953>
10. le Roux, S. M., Abrams, E. J., Nguyen, K. K., & Myer, L. (2019). HIV incidence during breastfeeding and mother-to-child transmission in Cape Town, South Africa. *AIDS (London, England)*, 33(8), 1399–1401. <https://doi.org/10.1097/QAD.0000000000002224>
11. AVAC: Global Advocacy for HIV Prevention. (2022). *A map-based tool to explore trends in oral PrEP use globally as countries introduce and scale up PrEP programs*. PrEPWatch: The Global PrEP Tracker. <https://data.prepwatch.org/>
12. Joseph Davey, D. L., Mvududu, R., Mashele, N., Lesosky, M., Khadka, N., Bekker, L., Gorbach, P., Coates, T. J., & Myer, L. (2022). Early pre-exposure prophylaxis (PrEP) initiation and continuation among pregnant and postpartum women in antenatal care in Cape Town, South Africa. *Journal of the International AIDS Society*, 25(2), e25866. <https://doi.org/10.1002/jia2.25866>
13. Kinuthia, J., Pintye, J., Abuna, F., Mugwanya, K. K., Lagat, H., Onyango, D., Begnel, E., Dettinger, J., Baeten, J. M., John-Stewart, G., Aquino, A. C., Ochieng, S. J., Lipesa, A. M., Naidu, A. L., Kamau, A., Njoroge, A. W., Okeah, B. O., Makabwa, C. B., Atieno, C. C., ... Fondo, Y. F. (2020). Pre-exposure prophylaxis uptake and early continuation among pregnant and post-partum women within maternal and child health clinics in Kenya: results from an implementation programme. *The Lancet HIV*, 7(1), e38–e48. [https://doi.org/10.1016/S2352-3018\(19\)30335-2](https://doi.org/10.1016/S2352-3018(19)30335-2)

14. Pintye J., Davey D. L. J., Wagner A. D., et al. Defining gaps in pre-exposure prophylaxis delivery for pregnant and postpartum women in high-burden settings using an implementation science framework. *Lancet HIV*. 2020;7(8):e582-e592. doi:10.1016/S2352-3018(20)30102-8
15. Davey D. L. J., Nyemba D., Castillo-Mancilla J., Weisner L., Norman J., Mvududu R., Mashele N., Johnson L. F., Bekker L., Gorbach P., Coates T. J., Myer L. (2022). Objective versus self-reported adherence to daily pre-exposure prophylaxis (PrEP) among pregnant and postpartum women in South Africa. *Lancet HIV*. Submitted.
16. Beesham, I., Dovel, K., Mashele, N., Bekker, L.-G., Gorbach, P., Coates, T. J., Myer, L., & Joseph Davey, D. L. (2022). Barriers to Oral HIV Pre-exposure Prophylaxis (PrEP) Adherence Among Pregnant and Post-partum Women from Cape Town, South Africa. *AIDS and Behavior*. <https://doi.org/10.1007/s10461-022-03652-2>
17. Beesham, I., Heffron, R., Evans, S., Baeten, J. M., Smit, J., Beksinska, M., & Mansoor, L. E. (2021). Exploring the Use of Oral Pre-exposure Prophylaxis (PrEP) Among Women from Durban, South Africa as Part of the HIV Prevention Package in a Clinical Trial. *AIDS and Behavior*, 25(4), 1112–1119. <https://doi.org/10.1007/s10461-020-03072-0>
18. Pintye, J., O'Malley, G., Kinuthia, J., Abuna, F., Escudero, J. N., Mugambi, M., Awuor, M., Dollah, A., Dettinger, J. C., Kohler, P., John-Stewart, G., & Beima-Sofie, K. (2021). Influences on early discontinuation and persistence of daily oral PrEP use among Kenyan adolescent girls and young women: a qualitative evaluation from a PrEP implementation program. *Journal of Acquired Immune Deficiency Syndromes (1999)*, 86(4), e83–e89. <https://doi.org/10.1097/QAI.0000000000002587>
19. Delany-Moretlwe S, Hughes JP, Bock P, Ouma SG, Hunidzarira P, Kalonji D, Kayange N, Makhema J, Mandima P, Mathew C, Spooner E, Mpendo J, Mukwekwerere P, Mgodini N, Ntege PN, Nair G, Nakabiito C, Nuwagaba-Biribonwoha H, Panchia R, Singh N, Siziba B, Farrior J, Rose S, Anderson PL, Eshleman SH, Marzinke MA, Hendrix CW, Beigel-Orme S, Hosek S, Tolley E, Sista N, Adeyeye A, Rooney JF, Rinehart A, Spreen WR, Smith K, Hanscom B, Cohen MS, Hosseinipour MC; HPTN 084 study group. Cabotegravir for the prevention of HIV-1 in women: results from HPTN 084, a phase 3, randomised clinical trial. *Lancet*. 2022 May 7;399(10337):1779-1789. doi: 10.1016/S0140-6736(22)00538-4. Epub 2022 Apr 1. Erratum in: *Lancet*. 2022 May 7;399(10337):1778. PMID: 35378077.
20. Delany-Moretlwe, S., Hughes, J., Guo, X., Hanscom, B., Hendrix, C. W., Farrior, J., Berhanu, R. H., Rinehart, A. R., Ford, S. L., Rooney, J. F., Adeyeye, A., Landovitz, R. J., Cohen, M. S., Hosseinipour, M. C., & Marzinke, M. (2022, February 12). Evaluation of CAB-LA safety and PK in pregnant women in the blinded phase of HPTN 084. CROI 2022, virtual meeting. <https://www.croiconference.org/abstract/evaluation-of-cab-la-safety-and-pk-in-pregnant-women-in-the-blinded-phase-of-hptn-084/>
21. Patel, P., Ford, S. L., Baker, M., Meyer, C., Garside, L., D'Amico, R., Van Solingen-Ristea, R., Crauwels, H., Polli, J., Seal, C., Thiagarajah, S., Birmingham, E., Spreen, W., Baugh, B., Bosse, M., & Vannappagari, V. (2021). 885. Pregnancy Outcomes and Pharmacokinetics in Pregnant Women Living with HIV Exposed to Long-Acting Cabotegravir and Rilpivirine in Clinical Trials. *Open Forum Infectious Diseases*, 8(Suppl 1), S534. <https://doi.org/10.1093/ofid/ofab466.1080>
22. Baeten, J. M., Palanee-Phillips, T., Mgodini, N. M., Mayo, A. J., Szydlo, D. W., Ramjee, G., Gati Mirembe, B., Mhlanga, F., Hunidzarira, P., Mansoor, L. E., Siva, S., Govender, V., Makanani, B., Naidoo, L., Singh, N., Nair, G., Chinula, L., Parikh, U. M., Mellors, J. W., ... MTN-025/HOPE Study Team. (2021). Safety, uptake, and use of a dapivirine vaginal ring for HIV-1 prevention in African women (HOPE): an open-label, extension study. *The Lancet. HIV*, 8(2), e87–e95. [https://doi.org/10.1016/S2352-3018\(20\)30304-0](https://doi.org/10.1016/S2352-3018(20)30304-0)
23. Dettinger, J. C., Kinuthia, J., Pintye, J., Mwongeli, N., Gómez, L., Richardson, B. A., Barnabas, R., Wagner, A. D., O'Malley, G., Baeten, J. M., & John-Stewart, G. (2019). PrEP Implementation for Mothers in Antenatal Care (PrIMA): study protocol of a cluster randomised trial. *BMJ Open*, 9(3), e025122. <https://doi.org/10.1136/bmjopen-2018-025122>
24. Joseph Davey, D. L., Mvududu, R., Mashele, N., Lesosky, M., Khadka, N., Bekker, L.-G., Gorbach, P., Coates, T. J., & Myer, L. (2022). Early pre-exposure prophylaxis (PrEP) initiation and continuation

- among pregnant and postpartum women in antenatal care in Cape Town, South Africa. *Journal of the International AIDS Society*, 25(2), e25866. <https://doi.org/10.1002/jia2.25866>
25. Harris, P. A., Taylor, R., Thielke, R., Payne, J., Gonzalez, N., & Conde, J. G. (2009). Research electronic data capture (REDCap)--a metadata-driven methodology and workflow process for providing translational research informatics support. *Journal of Biomedical Informatics*, 42(2), 377–381. <https://doi.org/10.1016/j.jbi.2008.08.010>
  26. Bush K, Kivlahan DR, McDonell MB, Fihn SD, Bradley KA. The AUDIT alcohol consumption questions (AUDIT-C): an effective brief screening test for problem drinking. Ambulatory Care Quality Improvement Project (ACQUIP). Alcohol Use Disorders Identification Test. *Arch Intern Med* 1998; **158**(16): 1789-95.
  27. Kader R, Seedat S, Koch JR, Parry CD. A preliminary investigation of the AUDIT and DUDIT in comparison to biomarkers for alcohol and drug use among HIV-infected clinic attendees in Cape Town, South Africa. *Afr J Psychiatry (Johannesbg)* 2012; **15**(5): 346-51.
  28. Klein, H., & Washington, T. A. (2019). The Pre-Exposure Prophylaxis (PrEP) Stigma Scale: Preliminary findings from a pilot study. *International Public Health Journal*, 11(2), 185–195. <https://www.ncbi.nlm.nih.gov/pmc/articles/PMC7034943/>
  29. Munthali, R. J., Stangl, A. L., Baron, D., Barré, I., Harvey, S., Ramskin, L., Colombini, M., Naicker, N., Kapiga, S., Delany-Moretlwe, S., & the EMPOWER study team. (2022). Prevalence and Risk Factors of PrEP Use Stigma Among Adolescent Girls and Young Women in Johannesburg, South Africa and Mwanza, Tanzania Participating in the EMPOWER Trial. *AIDS and Behavior*. <https://doi.org/10.1007/s10461-022-03721-6>
  30. Browne, E. N., Montgomery, E. T., Mansfield, C., Boeri, M., Mange, B., Beksinska, M., Schwartz, J. L., Clark, M. R., Doncel, G. F., Smit, J., Chirenje, Z. M., & van der Straten, A. (2020). Efficacy is Not Everything: Eliciting Women’s Preferences for a Vaginal HIV Prevention Product Using a Discrete-Choice Experiment. *AIDS and Behavior*, 24(5), 1443–1451. <https://doi.org/10.1007/s10461-019-02715-1>
  31. StataCorp. 2021. *Stata Statistical Software: Release 17*. College Station, TX: StataCorp LLC.
  32. Montgomery, E. T., Beksinska, M., Mgodhi, N., Schwartz, J., Weinrib, R., Browne, E. N., Mphili, N., Musara, P., Jaggernath, M., Ju, S., Smit, J., Chirenje, Z. M., Doncel, G. F., & van der Straten, A. (2019). End-user preference for and choice of four vaginally delivered HIV prevention methods among young women in South Africa and Zimbabwe: the Quatro Clinical Crossover Study. *Journal of the International AIDS Society*, 22(5), e25283. <https://doi.org/10.1002/jia2.25283>
  33. van der Straten, A., Ryan, J. H., Reddy, K., Etima, J., Taulo, F., Mutero, P., Taylor, J., Piper, J., Musara, P., & MTN-041/MAMMA Study Team. (2020). Influences on willingness to use vaginal or oral HIV PrEP during pregnancy and breastfeeding in Africa: the multisite MAMMA study. *Journal of the International AIDS Society*, 23(6), e25536. <https://doi.org/10.1002/jia2.25536>
  34. Shapley-Quinn, M. K., Manenzhe, K. N., Agot, K., Minnis, A. M., & van der Straten, A. (2019). “We are not the same”: African women’s view of multipurpose prevention products in the TRIO clinical study. *International Journal of Women’s Health*, 11, 97–107. <https://doi.org/10.2147/IJWH.S185712>
  35. Chappell, C. A., Harkoo, I., Szydlo, D. W., Bunge, K. E., Singh, D., Nakabiito, C., Mhlanga, F., Kamira, B., Piper, J. M., Balkus, J. E., & Hillier, S. L. (2019). Contraceptive method switching among women living in sub-Saharan Africa participating in an HIV-1 prevention trial: a prospective cohort study. *Contraception*, 100(3), 214–218. <https://doi.org/10.1016/j.contraception.2019.06.006>
  36. Clark, H., RamaRao, S., Unthank, C., Machiyama, K., & Thatte, N. (2017). *Family Planning Evidence Brief: Expanding Contraceptive Choice* (WHO/RHR/17.14 Rev.1). World Health Organization. <http://apps.who.int/iris/bitstream/handle/10665/255865/WHO-RHR-17.14-eng.pdf?sequence=1>
  37. Dehlendorf, C., Levy, K., Kelley, A., Grumbach, K., & Steinauer, J. (2013). Women’s preferences for contraceptive counseling and decision making. *Contraception*, 88(2), 250–256. <https://doi.org/10.1016/j.contraception.2012.10.012>
  38. Minnis, A. M., Atujuna, M., Browne, E. N., Ndwayana, S., Hartmann, M., Sindelo, S., Ngcwayi, N., Boeri, M., Mansfield, C., Bekker, L.-G., & Montgomery, E. T. (2020). Preferences for long-acting Pre-Exposure

- Prophylaxis (PrEP) for HIV prevention among South African youth: results of a discrete choice experiment. *Journal of the International AIDS Society*, 23(6), e25528. <https://doi.org/10.1002/jia2.25528>
39. Quaife, M., Eakle, R., Cabrera Escobar, M. A., Vickerman, P., Kilbourne-Brook, M., Mvundura, M., Delany-Moretlwe, S., & Terris-Prestholt, F. (2018). Divergent Preferences for HIV Prevention: A Discrete Choice Experiment for Multipurpose HIV Prevention Products in South Africa. *Medical Decision Making: An International Journal of the Society for Medical Decision Making*, 38(1), 120–133. <https://doi.org/10.1177/0272989X17729376>
  40. Shapley-Quinn, M. K., Manenzhe, K. N., Agot, K., Minnis, A. M., & van der Straten, A. (2019). “We are not the same”: African women’s view of multipurpose prevention products in the TRIO clinical study. *International Journal of Women’s Health*, 11, 97–107. <https://doi.org/10.2147/IJWH.S185712>
  41. Bekker, L. G., Li, S., Pathak, S., Tolley, E. E., Marzinke, M. A., Justman, J. E., Mgodi, N. M., Chirenje, M., Swaminathan, S., Adeyeye, A., Fariior, J., Hendrix, C. W., Piwowar-Manning, E., Richardson, P., Eshelman, S. H., Redinger, H., Williams, P., Sista, N. D., & HPTN 076 Study Team. (2020). Safety and tolerability of injectable Rilpivirine LA in HPTN 076: A phase 2 HIV pre-exposure prophylaxis study in women. *EClinicalMedicine*, 21, 100303. <https://doi.org/10.1016/j.eclinm.2020.100303>
  42. Tolley, E. E., Li, S., Zangeneh, S. Z., Atujuna, M., Musara, P., Justman, J., Pathak, S., Bekker, L.-G., Swaminathan, S., Stanton, J., Fariior, J., & Sista, N. (2019). Acceptability of a long-acting injectable HIV prevention product among US and African women: findings from a phase 2 clinical Trial (HPTN 076). *Journal of the International AIDS Society*, 22(10), e25408. <https://doi.org/10.1002/jia2.25408>
  43. Minnis, A. M., Browne, E. N., Boeri, M., Agot, K., van der Straten, A., Ahmed, K., Weinrib, R., & Mansfield, C. (2019). Young Women’s Stated Preferences for Biomedical HIV Prevention: Results of a Discrete Choice Experiment in Kenya and South Africa. *Journal of Acquired Immune Deficiency Syndromes (1999)*, 80(4), 394–403. <https://doi.org/10.1097/QAI.0000000000001945>
  44. Minnis, A. M., Krogstad, E., Shapley-Quinn, M. K., Agot, K., Ahmed, K., Danielle Wagner, L., van der Straten, A., & TRIO Study Team. (2021). Giving voice to the end-user: input on multipurpose prevention technologies from the perspectives of young women in Kenya and South Africa. *Sexual and Reproductive Health Matters*, 29(1), 1927477. <https://doi.org/10.1080/26410397.2021.1927477>
  45. Escudero, J. N., Dettinger, J. C., Pintye, J., Kinuthia, J., Lagat, H., Abuna, F., Kohler, P., Baeten, J. M., O’Malley, G., John-Stewart, G. C., & Beima-Sofie, K. M. (2020). Community Perceptions About Use of Pre-exposure Prophylaxis Among Adolescent Girls and Young Women in Kenya. *The Journal of the Association of Nurses in AIDS Care: JANAC*, 31(6), 669–677. <https://doi.org/10.1097/JNC.000000000000191>
  46. Bergam, S., Harrison, A. D., Benghu, N., Khumalo, S., Tesfay, N., Exner, T., Miller, L., Dolezal, C., Hanass-Hancock, J., & Hoffman, S. (2022). Women’s Perceptions of HIV- and Sexuality-Related Stigma in Relation to PrEP: Qualitative Findings from the Masibambane Study, Durban, South Africa. *AIDS and Behavior*. <https://doi.org/10.1007/s10461-022-03632-6>
  47. Velloza, J., Khoza, N., Scorgie, F., Chitukuta, M., Mutero, P., Mutiti, K., Mangxilana, N., Nobula, L., Bulterys, M. A., Atujuna, M., Hosek, S., Heffron, R., Bekker, L.-G., Mgodi, N., Chirenje, M., Celum, C., Delany-Moretlwe, S., & HPTN 082 study group. (2020). The influence of HIV-related stigma on PrEP disclosure and adherence among adolescent girls and young women in HPTN 082: a qualitative study. *Journal of the International AIDS Society*, 23(3), e25463. <https://doi.org/10.1002/jia2.25463>
  48. Pintye, J., Beima-Sofie, K. M., Makabong’O, P. A., Njoroge, A., Trinidad, S. B., Heffron, R. A., Baeten, J. M., Celum, C., Matemo, D., Kinuthia, J., Kelley, M. C., & John-Stewart, G. C. (2018). HIV-Uninfected Kenyan Adolescent and Young Women Share Perspectives on Using Pre-Exposure Prophylaxis During Pregnancy. *AIDS Patient Care and STDs*, 32(12), 538–544. <https://doi.org/10.1089/apc.2018.0058>
  49. Rousseau, E., Katz, A. W. K., O’Rourke, S., Bekker, L.-G., Delany-Moretlwe, S., Bukusi, E., Travill, D., Omollo, V., Morton, J. F., O’Malley, G., Haberer, J. E., Heffron, R., Johnson, R., Celum, C., Baeten, J. M., & van der Straten, A. (2021). Adolescent girls and young women’s PrEP-user journey during an implementation science study in South Africa and Kenya. *PLoS One*, 16(10), e0258542. <https://doi.org/10.1371/journal.pone.0258542>

50. Moran, A., Mashele, N., Mvududu, R., Gorbach, P., Bekker, L.-G., Coates, T. J., Myer, L., & Joseph Davey, D. (2022). Maternal PrEP Use in HIV-Uninfected Pregnant Women in South Africa: Role of Stigma in PrEP Initiation, Retention and Adherence. *AIDS and Behavior*, 26(1), 205–217. <https://doi.org/10.1007/s10461-021-03374-x>
51. Mayo, A. J., Browne, E. N., Montgomery, E. T., Torjesen, K., Palanee-Phillips, T., Jeenaarain, N., Seyama, L., Woeber, K., Harkoo, I., Reddy, K., Tembo, T., Mutero, P., Tauya, T., Chitukuta, M., Gati Mirembe, B., Soto-Torres, L., Brown, E. R., Baeten, J. M., van der Straten, A., & MTN-020/ASPIRE study team. (2021). Acceptability of the Dapivirine Vaginal Ring for HIV-1 Prevention and Association with Adherence in a Phase III Trial. *AIDS and Behavior*, 25(8), 2430–2440. <https://doi.org/10.1007/s10461-021-03205-z>
52. Montgomery, E. T., van der Straten, A., Chitukuta, M., Reddy, K., Woeber, K., Atujuna, M., Bekker, L.-G., Etima, J., Nakyanzi, T., Mayo, A. J., Katz, A., Laborde, N., Grossman, C. I., Soto-Torres, L., Palanee-Phillips, T., Baeten, J. M., & MTN-020/ASPIRE Study. (2017). Acceptability and use of a dapivirine vaginal ring in a phase III trial. *AIDS (London, England)*, 31(8), 1159–1167. <https://doi.org/10.1097/QAD.0000000000001452>
53. Nel, A., Bekker, L.-G., Bukusi, E., Hellström, E., Kotze, P., Louw, C., Martinson, F., Masenga, G., Montgomery, E., Ndaba, N., van der Straten, A., van Niekerk, N., & Woodsong, C. (2016). Safety, Acceptability and Adherence of Dapivirine Vaginal Ring in a Microbicide Clinical Trial Conducted in Multiple Countries in Sub-Saharan Africa. *PloS One*, 11(3), e0147743. <https://doi.org/10.1371/journal.pone.0147743>
54. van der Straten, A., Ryan, J. H., Reddy, K., Etima, J., Taulo, F., Mutero, P., Taylor, J., Piper, J., Musara, P., & MTN-041/MAMMA Study Team. (2020). Influences on willingness to use vaginal or oral HIV PrEP during pregnancy and breastfeeding in Africa: the multisite MAMMA study. *Journal of the International AIDS Society*, 23(6), e25536. <https://doi.org/10.1002/jia2.25536>
55. Minnis, A. M., Browne, E. N., Boeri, M., Agot, K., van der Straten, A., Ahmed, K., Weinrib, R., & Mansfield, C. (2019). Young Women’s Stated Preferences for Biomedical HIV Prevention: Results of a Discrete Choice Experiment in Kenya and South Africa. *Journal of Acquired Immune Deficiency Syndromes (1999)*, 80(4), 394–403. <https://doi.org/10.1097/QAI.0000000000001945>
56. van der Straten, A., Agot, K., Ahmed, K., Weinrib, R., Browne, E. N., Manenzhe, K., Owino, F., Schwartz, J., Minnis, A., & TRIO Study Team. (2018). The Tablets, Ring, Injections as Options (TRIO) study: what young African women chose and used for future HIV and pregnancy prevention. *Journal of the International AIDS Society*, 21(3), e25094. <https://doi.org/10.1002/jia2.25094>
57. Weinrib, R., Minnis, A., Agot, K., Ahmed, K., Owino, F., Manenzhe, K., Cheng, H., & van der Straten, A. (2018). End-Users’ Product Preference Across Three Multipurpose Prevention Technology Delivery Forms: Baseline Results from Young Women in Kenya and South Africa. *AIDS and Behavior*, 22(1), 133–145. <https://doi.org/10.1007/s10461-017-1911-6>



**Table 1: Demographics and health characteristics of pregnant and postpartum women with experience taking oral PrEP, South Africa and Kenya, September 2021 – February 2022 (N=394 women)**

|                                                               | Overall<br>(N=394, %) | South Africa<br>(n=190, %) | Kenya<br>(n=204, %) | p-value |
|---------------------------------------------------------------|-----------------------|----------------------------|---------------------|---------|
| Age (median, IQR)                                             | 28 [24-32]            | 27 [22-32]                 | 29 [25-33]          | <0.01   |
| Pregnant (n, %)                                               | 105 (27)              | 63 (33)                    | 42 (21)             | 0.01    |
| Postpartum (n, %)                                             | 289 (73)              | 127 (67)                   | 162 (79)            | 0.01    |
| Days on oral PrEP (median, IQR)                               | 335 [168-420]         | 337 [263-420]              | 308 [114-442]       | 0.04    |
| Last grade completed (n, %)                                   |                       |                            |                     |         |
| Primary school (Grades 1-6)                                   | 28 (7)                | 2 (1)                      | 26 (13)             | <0.01   |
| Some secondary school (Grades 7-11)                           | 236 (60)              | 106 (56)                   | 130 (64)            |         |
| Completed secondary school                                    | 90 (23)               | 70 (37)                    | 20 (9)              |         |
| Some tertiary                                                 | 16 (4)                | 8 (4)                      | 8 (4)               |         |
| Completed tertiary                                            | 24 (6)                | 4 (2)                      | 20 (10)             |         |
| Currently employed (formally or informally)? (n, %)           |                       |                            |                     |         |
| No                                                            | 313 (79)              | 136 (72)                   | 177 (87)            | <0.01   |
| Yes                                                           | 80 (20)               | 54 (28)                    | 26 (13)             |         |
| Prefer not to answer                                          | 1 (1)                 | 0 (0)                      | 1 (1)               |         |
| Currently have at least one sexual partner (n, %)             |                       |                            |                     |         |
| No                                                            | 21 (5)                | 15 (8)                     | 6 (3)               | 0.03    |
| Yes                                                           | 373 (95)              | 175 (92)                   | 198 (97)            |         |
| HIV Risk Perception <sup>†</sup> (n, %)                       |                       |                            |                     |         |
| No risk at all                                                | 121/380 (32)          | 84/176 (48)                | 37 (18)             | <0.01   |
| Small chance                                                  | 145/380 (44)          | 56/176 (32)                | 89 (44)             |         |
| Moderate chance                                               | 89/380 (34)           | 20/176 (11)                | 69 (34)             |         |
| Great chance                                                  | 23/380 (6)            | 16/176 (9)                 | 7 (3)               |         |
| Prefer not to answer                                          | 2/380 (1)             | 0/176 (0)                  | 2 (1)               |         |
| Current alcohol use (n, %)                                    |                       |                            |                     |         |
| Never                                                         | 363/380 (96)          | 164/176 (93)               | 199 (98)            | 0.31    |
| Monthly or less                                               | 11/380 (3)            | 8/176 (5)                  | 3 (2)               |         |
| 2-4 times a month                                             | 5/380 (1)             | 3/176 (2)                  | 2 (1)               |         |
| 2-3 times a week                                              | 1/380 (1)             | 1/176 (1)                  | 0 (0)               |         |
| 4 or more times a week                                        | 0 (0)                 | 0 (0)                      | 0 (0)               |         |
| HIV PrEP Stigma <sup>‡</sup> (n, %)                           |                       |                            |                     |         |
| Endorsed 0 forms of stigma                                    | 251/380 (66)          | 128/176 (73)               | 123 (60)            | 0.01    |
| Endorsed >1 form of stigma                                    | 129/380 (34)          | 48/176 (27)                | 81 (40)             |         |
| Any oral PrEP use over past 30 days (n, %)                    |                       |                            |                     |         |
| No                                                            | 100 (25)              | 34 (18)                    | 66 (32)             | <0.01   |
| Yes                                                           | 294 (75)              | 156 (82)                   | 138 (68)            |         |
| Clinic transportation (n, %)                                  |                       |                            |                     |         |
| Walking                                                       | 31 (8)                | 16 (8)                     | 15 (7)              | <0.01   |
| Taxi/Minibus                                                  | 206 (52)              | 172 (91)                   | 34 (17)             |         |
| Private car                                                   | 3 (1)                 | 2 (1)                      | 1 (1)               |         |
| Motorbike                                                     | 152 (38)              | 0 (0)                      | 152 (75)            |         |
| Other                                                         | 2 (1)                 | 0 (0)                      | 2 (1)               |         |
| Total travel time to clinic and return (minutes, median, IQR) | 40 [30-60]            | 30 [20.0-40.0]             | 55 [31.0-60.0]      | <0.01   |
| Cost to travel to clinic and return (USD, median, IQR)        | 1.32 [1.31-1.74]      | 1.32 [1.32-1.32]           | 1.75 [0.88-2.64]    | 0.02    |

<sup>†</sup> Participants were asked “How would you describe your chances of getting HIV in the next year?” with the option to select “No risk at all,” “Small chance,” “Moderate chance,” “Great chance,” or “Prefer not to answer.”

<sup>‡</sup> Participants were asked to respond on a 5-point Likert scale from “Strongly Disagree” to “Strongly Agree” to 7 statements on potential stigma experienced regarding PrEP use (i.e. “I feel ashamed of using PrEP,” “I feel embarrassed about using PrEP”).

Have you ever used any of the following family planning methods? (n, %)

|                            |          |          |          |       |
|----------------------------|----------|----------|----------|-------|
| Male condom                | 217 (55) | 171 (90) | 46 (23)  | <0.01 |
| Oral contraceptive pill    | 98 (25)  | 42 (22)  | 56 (27)  | 0.22  |
| Injectable contraceptive   | 312 (79) | 178 (94) | 134 (66) | <0.01 |
| Contraceptive implant      | 181 (46) | 70 (37)  | 111 (54) | <0.01 |
| Female condom              | 8 (2)    | 6 (3)    | 2 (1)    | 0.97  |
| Vaginal contraceptive ring | 2 (1)    | 0 (0)    | 2 (1)    | 0.27  |
| IUD/loop                   | 6 (2)    | 3 (2)    | 3 (2)    | 0.69  |
| Other (tubal ligation)     | 2 (1)    | 0 (0)    | 2 (1)    | 0.27  |
| None                       | 11 (3)   | 1 (1)    | 9 (4)    | 0.01  |

**Table 2: Likes and dislikes regarding daily oral PrEP in pregnant and postpartum women with experience taking oral PrEP, South Africa and Kenya, September 2021 – February 2022**

| <b>Oral PrEP likes</b>                                           | <b>Overall<br/>(N=394)</b> | <b>South Africa<br/>(n=190)</b> | <b>Kenya<br/>(n=204)</b> | <b>p-value</b> |
|------------------------------------------------------------------|----------------------------|---------------------------------|--------------------------|----------------|
| HIV prevention                                                   | 386 (98)                   | 186 (98)                        | 200 (98)                 | 0.92           |
| PrEP has few/no side effects                                     | 61 (15)                    | 35 (18)                         | 26 (13)                  | 0.12           |
| Ease of use                                                      | 27 (7)                     | 16 (8)                          | 11 (5)                   | 0.23           |
| No interruption of sex (as is needed for condoms)                | 16 (4)                     | 5 (3)                           | 11 (5)                   | 0.17           |
| Easy to hide                                                     | 10 (3)                     | 0 (0)                           | 10 (5)                   | <0.01          |
| Take it daily                                                    | 8 (2)                      | 5 (3)                           | 3 (2)                    | 0.88           |
| Taken orally                                                     | 7 (2)                      | 5 (3)                           | 2 (1)                    | 0.95           |
| PrEP is safe for the baby                                        | 5 (1)                      | 5 (3)                           | 0 (0)                    | 0.03           |
| Other (e.g., overall safety, increased appetite, peaceful sleep) | 4 (1)                      | 4 (2)                           | 0 (0)                    | 0.05           |
| Nothing                                                          | 1 (1)                      | 0 (0)                           | 1 (1)                    | 0.52           |
| <b>Oral PrEP dislikes</b>                                        | <b>Overall<br/>(N=394)</b> | <b>South Africa<br/>(n=190)</b> | <b>Kenya<br/>(n=204)</b> | <b>p-value</b> |
| Side effects                                                     | 100 (25)                   | 39 (21)                         | 61 (30)                  | 0.03           |
| Must take it daily                                               | 90 (23)                    | 38 (20)                         | 52 (25)                  | 0.20           |
| Must take orally                                                 | 35 (9)                     | 12 (6)                          | 23 (11)                  | 0.08           |
| Pill size is too big                                             | 12 (3)                     | 9 (5)                           | 3 (2)                    | 0.99           |
| No STI prevention                                                | 10 (3)                     | 4 (2)                           | 6 (3)                    | 0.42           |
| Not discreet                                                     | 9 (2)                      | 0 (0)                           | 9 (4)                    | <0.01          |
| Other (e.g., general dislike, pill taste, pill smell)            | 3 (1)                      | 2 (1)                           | 1 (1)                    | 0.90           |
| Nothing                                                          | 201 (51)                   | 111 (58)                        | 90 (44)                  | <0.01          |

**Table 3: Ranked characteristics of potential HIV prevention products among pregnant and postpartum women with experience taking oral PrEP, South Africa and Kenya, September 2021 – February 2022**

| <b>Most important characteristic of a potential HIV prevention product (ranked #1)</b>                | <b>Overall (N=394)</b> | <b>South Africa (n=190)</b> | <b>Kenya (n=204)</b> | <b>p-value</b> |
|-------------------------------------------------------------------------------------------------------|------------------------|-----------------------------|----------------------|----------------|
| Effective at preventing HIV                                                                           | 203 (52)               | 44 (23)                     | 159 (78)             | <0.01          |
| Healthy pregnancy                                                                                     | 47 (12)                | 36 (19)                     | 11 (5)               | <0.01          |
| How frequently it is used (e.g. before sex, once a day, once a month)                                 | 39 (10)                | 35 (18)                     | 4 (2)                | <0.01          |
| Side effects                                                                                          | 39 (10)                | 31 (16)                     | 8 (4)                | <0.01          |
| Ability to breastfeed and have healthy baby                                                           | 26 (7)                 | 15 (8)                      | 11 (5)               | 0.32           |
| How it is used (e.g. vaginal ring, injected, pill)                                                    | 25 (6)                 | 16 (8)                      | 9 (4)                | 0.10           |
| Privacy (from partner)                                                                                | 13 (3)                 | 11 (6)                      | 2 (1)                | 0.01           |
| Other (not forgotten easily, overall safety)                                                          | 2 (1)                  | 2 (1)                       | 0 (0)                | 0.23           |
| <b>Most important access-related characteristic of a potential HIV prevention product (ranked #1)</b> |                        |                             |                      |                |
| Free of charge                                                                                        | 203 (52)               | 104 (55)                    | 99 (49)              | 0.22           |
| How easy it is to obtain                                                                              | 79 (20)                | 43 (23)                     | 36 (18)              | 0.22           |
| Where to pick up (clinic, pharmacy, community)                                                        | 48 (12)                | 28 (15)                     | 20 (10)              | 0.14           |
| Total time it takes to get product                                                                    | 31 (8)                 | 15 (8)                      | 16 (8)               | 0.99           |
| <b>Most preferable frequency of HIV prevention method (ranked #1)</b>                                 |                        |                             |                      |                |
| Before sex                                                                                            | 53 (13)                | 30 (16)                     | 23 (11)              | 0.19           |
| After sex                                                                                             | 6 (2)                  | 5 (3)                       | 1 (1)                | 0.10           |
| Every day                                                                                             | 46 (12)                | 26 (14)                     | 20 (10)              | 0.23           |
| Once per month                                                                                        | 62 (16)                | 25 (13)                     | 37 (18)              | 0.18           |
| Once every 2-3 months                                                                                 | 59 (15)                | 17 (9)                      | 42 (21)              | <0.01          |
| Once every 6 months                                                                                   | 45 (11)                | 11 (6)                      | 34 (17)              | <0.01          |
| Once yearly                                                                                           | 123 (31)               | 76 (40)                     | 47 (23)              | <0.01          |

**Figure 1: Theoretical acceptability of long-acting PrEP methods versus daily oral PrEP by pregnant and postpartum women with experience taking oral PrEP, Kenya and South Africa, September 2021 – February 2022 (N=394 women)**

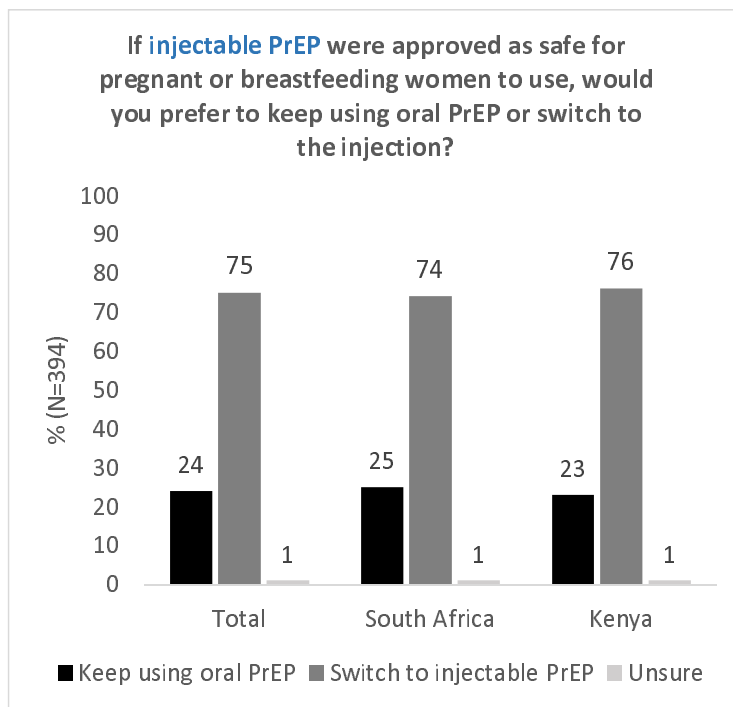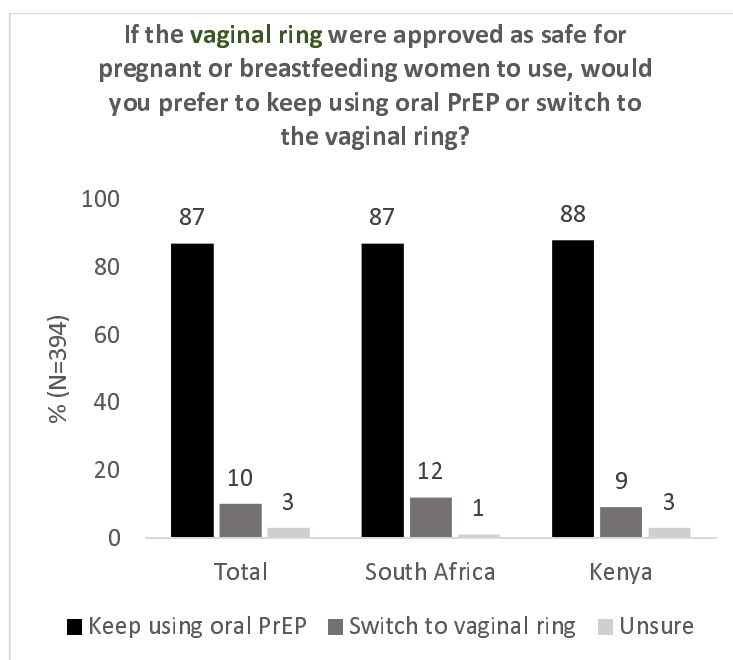

**Table 4: Factors associated with of long-acting PrEP preference vs. oral PrEP among pregnant and postpartum women with experience taking oral PrEP, N=394**

|                                                                                 | Summary Statistics              |                              |                           |            |                                      |            |
|---------------------------------------------------------------------------------|---------------------------------|------------------------------|---------------------------|------------|--------------------------------------|------------|
|                                                                                 | Wants long-acting<br>(n=305, %) | Wants oral PrEP<br>(n=89, %) | Unadjusted OR<br>(95% CI) | p-value    | Adjusted OR <sup>†</sup><br>(95% CI) | p-value    |
| <i>Maternal age (median, IQR) years</i>                                         | 28 [24-32]                      | 27 [23-31]                   | 1.03 [0.99-1.08]          | 0.11       | 1.04 [0.99, 1.08]                    | 0.11       |
| ≥25 years                                                                       | 221 (72)                        | 59 (66)                      | 1.34 [0.81-2.22]          | 0.26       | 1.35 [0.81-2.27]                     | 0.25       |
| <25 years                                                                       | 84 (28)                         | 30 (34)                      |                           |            |                                      |            |
| <i>Country</i>                                                                  |                                 |                              |                           |            |                                      |            |
| Kenya                                                                           | 158 (52)                        | 46 (52)                      | 1.01 [0.63-1.61]          | 0.98       | 0.93 [0.57, 1.51]                    | 0.77       |
| South Africa                                                                    | 147 (48)                        | 43 (48)                      |                           |            |                                      |            |
| <i>Pregnancy status</i>                                                         |                                 |                              |                           |            |                                      |            |
| Pregnant                                                                        | 78 (26)                         | 27 (30)                      | 0.79 [0.47-1.33]          | 0.37       | 0.82 [0.48, 1.39]                    | 0.46       |
| Postpartum                                                                      | 227 (74)                        | 62 (70)                      |                           |            |                                      |            |
| <i>Time on PrEP (median, IQR) days</i>                                          | 331 [168-422]                   | 336 [185-420]                | 1.00 [1.00-1.00]          | 0.90       | 1.00 [1.00-1.00]                     | 0.78       |
| <i>Last grade completed (ref: primary school)</i>                               | 27 (9)                          | 10 (11)                      | <i>ref</i>                | <i>ref</i> | <i>ref</i>                           | <i>ref</i> |
| Some secondary                                                                  | 178 (58)                        | 64 (72)                      | 1.20 [0.55-2.64]          | 0.64       | 1.12 [0.52, 2.74]                    | 0.67       |
| Completed secondary                                                             | 72 (24)                         | 17 (19)                      | 1.48 [0.61-3.61]          | 0.39       | 1.62 [0.61, 4.32]                    | 0.34       |
| Some or all tertiary                                                            | 20 (7)                          | 3 (3)                        | 1.78 [0.53-5.94]          | 0.35       | 1.68 [0.49, 5.79]                    | 0.41       |
| <i>Currently employed (formally or informally)</i>                              |                                 |                              |                           |            |                                      |            |
| Employed                                                                        | 61/304 (20)                     | 19 (21)                      | 0.93 [0.52-1.65]          | 0.79       | 0.81 [0.44-1.49]                     | 0.49       |
| Not employed                                                                    | 243/304 (80)                    | 70 (79)                      |                           |            |                                      |            |
| <i>At least one sexual partner</i>                                              |                                 |                              |                           |            |                                      |            |
| ≥1 sexual partner                                                               | 288 (94)                        | 85 (96)                      | 0.80 [0.26-2.43]          | 0.69       | 0.75 [0.24-2.30]                     | 0.61       |
| 0 sexual partners                                                               | 16 (5)                          | 4 (4)                        |                           |            |                                      |            |
| <i>PrEP stigma (median, IQR)</i>                                                | 14 [13-17]                      | 15 [13-16]                   | 1.02 [0.96-1.09]          | 0.56       | 1.03 [0.96-1.10]                     | 0.45       |
| Endorsed 0 stigma                                                               | 193/293 (66)                    | 58/87 (67)                   | 1.03 [0.62-1.72]          | 0.89       | 1.06 [0.63-1.77]                     | 0.83       |
| Endorsed ≥1 stigma statement                                                    | 100/293 (34)                    | 29/87 (33)                   |                           |            |                                      |            |
| <i>HIV Risk Perception</i>                                                      |                                 |                              |                           |            |                                      |            |
| Any perceived HIV risk                                                          | 194/291 (67)                    | 63/87 (72)                   | 0.76 [0.45, 1.29]         | 0.31       | 0.75 [0.43, 1.31]                    | 0.31       |
| No perceived HIV risk                                                           | 97/291 (33)                     | 24/87 (28)                   |                           |            |                                      |            |
| <i>Alcohol use</i>                                                              |                                 |                              |                           |            |                                      |            |
| Endorses any alcohol use                                                        | 12/293 (4)                      | 5/87 (6)                     | 0.70 [0.24-2.05]          | 0.52       | 0.73 [0.25-2.17]                     | 0.58       |
| Does not endorse alcohol use                                                    | 281/293 (96)                    | 82/87 (94)                   |                           |            |                                      |            |
| <i>PrEP persistence (has the participant taken PrEP over the past 30 days?)</i> |                                 |                              |                           |            |                                      |            |
| Yes                                                                             | 222 (73)                        | 72 (81)                      | 0.63 [0.35-1.13]          | 0.12       | 0.65 [0.36, 1.19]                    | 0.16       |
| No                                                                              | 83 (27)                         | 17 (19)                      |                           |            |                                      |            |
| <i>Time traveled to clinic and return (median, IQR)</i>                         | 40 [30-60]                      | 40 [30-60]                   | 1.00 [0.99-1.01]          | 0.95       | 0.99 [0.99-1.01]                     | 0.99       |

|                                                             |                  |                  |                         |              |                          |                 |
|-------------------------------------------------------------|------------------|------------------|-------------------------|--------------|--------------------------|-----------------|
| <i>minutes</i>                                              |                  |                  |                         |              |                          |                 |
| <i>Cost to travel to clinic and return (median, IQR)</i>    | 1.29 [1.29-1.71] | 1.29 [1.29-1.71] | 1.12 [0.86-1.45]        | 0.40         | 1.11 [0.85-1.45]         | 0.44            |
| <i>USD equivalent</i>                                       |                  |                  |                         |              |                          |                 |
| <i>Contraceptive used in the past</i>                       |                  |                  |                         |              |                          |                 |
| <b>Injection</b>                                            | <b>252 (83)</b>  | <b>60 (67)</b>   | <b>2.30 [1.35-3.92]</b> | <b>0.002</b> | <b>2.48 [1.34, 4.57]</b> | <b>&lt;0.01</b> |
| Condom                                                      | 172 (56)         | 45 (51)          | 1.26 [0.79-2.03]        | 0.33         | 1.59 [0.82, 3.07]        | 0.17            |
| Implant                                                     | 134 (44)         | 47 (53)          | 0.70 [0.44-1.12]        | 0.14         | 0.71 [0.44, 1.16]        | 0.17            |
| Oral contraceptive                                          | 79 (26)          | 19 (21)          | 1.29 [0.73-2.27]        | 0.38         | 1.22 [0.69-2.17]         | 0.50            |
| <b>Female condom</b>                                        | <b>4 (1)</b>     | <b>4 (4)</b>     | <b>0.28 [0.07-1.15]</b> | <b>0.08</b>  | <b>0.27 [0.07-1.12]</b>  | <b>0.07</b>     |
| Vaginal ring                                                | 1 (0.3)          | 1 (0.3)          | 0.29 [0.02-4.68]        | 0.38         | 0.27 [0.02-4.42]         | 0.36            |
| <i>Oral PrEP likes</i>                                      |                  |                  |                         |              |                          |                 |
| HIV prevention                                              | 298 (98)         | 87 (98)          | 0.98 [0.20-4.80]        | 0.98         | 0.95 [0.19-4.66]         | 0.95            |
| No side effects                                             | 50 (16)          | 11 (12)          | 1.39 [0.69-2.80]        | 0.36         | 1.43 [0.71-2.90]         | 0.32            |
| Ease of use                                                 | 21 (7)           | 6 (7)            | 1.02 [0.40-2.62]        | 0.96         | 1.07 [0.41-2.75]         | 0.90            |
| No interruption of sex                                      | 12 (4)           | 4 (4)            | 0.87 [0.27-2.77]        | 0.81         | 0.87 [0.27-2.80]         | 0.82            |
| Easy to hide                                                | 7 (2)            | 3 (3)            | 0.67 [0.17-2.66]        | 0.57         | 0.63 [0.16-2.56]         | 0.52            |
| <b>Take it daily</b>                                        | <b>4 (1)</b>     | <b>4 (4)</b>     | <b>0.28 [0.07-1.15]</b> | <b>0.08</b>  | <b>0.30 [0.07-1.24]</b>  | <b>0.10</b>     |
| Take it orally                                              | 4 (1)            | 3 (3)            | 0.38 [0.08-1.73]        | 0.21         | 0.38 [0.08-1.77]         | 0.22            |
| Nothing                                                     | 1 (0.3)          | 0 (0)            | --                      | --           | ---                      | ---             |
| <i>Oral PrEP dislikes</i>                                   |                  |                  |                         |              |                          |                 |
| <b>Dislikes at least one thing about oral PrEP</b>          | <b>158 (52)</b>  | <b>35 (39)</b>   | <b>1.66 [1.03-2.68]</b> | <b>0.04</b>  | <b>1.72 [1.05, 2.80]</b> | <b>0.03</b>     |
| Side effects                                                | 81 (27)          | 18 (20)          | 1.43 [0.80-2.54]        | 0.23         | 1.43 [0.80, 2.55]        | 0.23            |
| <b>Daily use</b>                                            | <b>75 (25)</b>   | <b>13 (15)</b>   | <b>1.91 [1.00-3.63]</b> | <b>0.05</b>  | <b>1.92 [1.01, 3.67]</b> | <b>0.05</b>     |
| Take it orally                                              | 28 (9)           | 7 (8)            | 1.18 [0.50-2.81]        | 0.70         | 1.20 [0.50, 2.85]        | 0.69            |
| Not discreet                                                | 7 (2)            | 2 (2)            | 1.02 [0.21-5.01]        | 0.98         | 1.09 [0.22, 5.46]        | 0.92            |
| No STI protection                                           | 6 (2)            | 4 (4)            | 0.43 [0.12-1.55]        | 0.20         | 0.45 [0.12, 1.64]        | 0.23            |
| <i>Preferred frequency of PrEP use</i>                      |                  |                  |                         |              |                          |                 |
| <b>Ranked every month, 2-3 months, 6 months, or year #1</b> | <b>230 (75)</b>  | <b>59 (66)</b>   | <b>1.56 [0.94-2.60]</b> | <b>0.09</b>  | <b>1.58 [0.94, 2.65]</b> | <b>0.08</b>     |
| Ranked before sex, after sex, or every day #1               | 75 (25)          | 30 (34)          |                         |              |                          |                 |
| <i>Interested in community PrEP delivery</i>                |                  |                  |                         |              |                          |                 |
| Yes                                                         | 131 (43)         | 32 (36)          | 1.34 [0.82-2.19]        | 0.24         | 1.45 [0.85, 2.45]        | 0.17            |
| No                                                          | 174 (57)         | 57 (64)          |                         |              |                          |                 |

† Each individual model adjusted for maternal age, country  
**Bold p<0.10**

**Supplementary Table 1: Reasons behind preference of long-acting PrEP methods versus oral PrEP methods by pregnant and postpartum women with experience taking oral PrEP, South Africa and Kenya**

| <b>If injectable PrEP was approved as safe for pregnant women to use, would you prefer to keep using oral PrEP or switch to the injection?</b>                      | <b>Overall (N=394)</b> | <b>South Africa (n=190)</b> | <b>Kenya (n=204)</b> | <b>p-value</b> |
|---------------------------------------------------------------------------------------------------------------------------------------------------------------------|------------------------|-----------------------------|----------------------|----------------|
| Keep using oral PrEP                                                                                                                                                | 94 (24)                | 48 (25)                     | 46 (23)              | 0.53           |
| Switch to injectable PrEP                                                                                                                                           | 297 (75)               | 141 (74)                    | 156 (76)             | 0.60           |
| Unsure                                                                                                                                                              | 3 (0.8)                | 1 (0.5)                     | 2 (1)                | 0.53           |
| <i>For those who selected injectable PrEP over oral PrEP: What characteristics about the injection make you interested in switching?</i>                            |                        |                             |                      |                |
|                                                                                                                                                                     | <b>Overall (n=297)</b> | <b>South Africa (n=141)</b> | <b>Kenya (n=156)</b> | <b>p-value</b> |
| Longer duration/once every 8 weeks                                                                                                                                  | 188 (63)               | 123 (87)                    | 65 (42)              | <0.01          |
| Not having to remember to take a pill every day                                                                                                                     | 144 (48)               | 80 (57)                     | 64 (41)              | <0.01          |
| Easy to keep private from my partner/others                                                                                                                         | 83 (28)                | 7 (5)                       | 76 (49)              | <0.01          |
| Administered by medical professional                                                                                                                                | 40 (13)                | 9 (6)                       | 31 (20)              | <0.01          |
| Not carrying pills                                                                                                                                                  | 83 (28)                | 18 (13)                     | 65 (42)              | <0.01          |
| Other (e.g., fewer potential side effects, comfort with contraceptive injection)                                                                                    | 5 (2)                  | 5 (4)                       | 0 (0)                | 0.02           |
| <i>For those who selected "Oral PrEP" or "Unsure": What characteristics about the injection make you not interested or unsure about switching?</i>                  |                        |                             |                      |                |
|                                                                                                                                                                     | <b>Overall (n=97)</b>  | <b>South Africa (n=49)</b>  | <b>Kenya (n=48)</b>  | <b>p-value</b> |
| Injection pain                                                                                                                                                      | 71 (73)                | 37 (76)                     | 34 (71)              | 0.60           |
| Potential side effects                                                                                                                                              | 24 (25)                | 15 (31)                     | 9 (19)               | 0.18           |
| Not enough safety data (i.e. afraid of impact on me)                                                                                                                | 13 (13)                | 2 (4)                       | 11 (23)              | <0.01          |
| Worry about impact on baby's health after delivery due to being on PrEP while breastfeeding                                                                         | 6 (6)                  | 0 (0)                       | 6 (13)               | 0.01           |
| Worry about impact on having a healthy pregnancy due to PrEP                                                                                                        | 3 (3)                  | 0 (0)                       | 3 (6)                | 0.12           |
| Once every 8 weeks                                                                                                                                                  | 1 (1)                  | 0 (0)                       | 1 (2)                | 0.50           |
| Other (e.g., needle fears, does not want more clinic, mistrust of contraceptive injection, used to oral PrEP)                                                       | 5 (5)                  | 5 (10)                      | 0 (0)                | 0.03           |
| <b>If the vaginal ring was approved as safe for pregnant or breastfeeding women to use, would you prefer to keep using oral PrEP or switch to the vaginal ring?</b> |                        |                             |                      |                |
|                                                                                                                                                                     | <b>Overall (N=394)</b> | <b>South Africa (n=190)</b> | <b>Kenya (n=204)</b> | <b>p-value</b> |
| Keep using oral PrEP                                                                                                                                                | 344 (87)               | 165 (87)                    | 179 (88)             | 0.79           |
| Switch to vaginal ring                                                                                                                                              | 40 (10)                | 22 (12)                     | 18 (9)               | 0.37           |
| Unsure                                                                                                                                                              | 10 (3)                 | 3 (2)                       | 7 (3)                | 0.20           |
| <i>For those who selected vaginal ring over oral PrEP: What characteristics about the ring make you interested in switching?</i>                                    |                        |                             |                      |                |
|                                                                                                                                                                     | <b>Overall (n=40)</b>  | <b>South Africa (n=22)</b>  | <b>Kenya (n=18)</b>  | <b>p-value</b> |
| Longer duration/once a month                                                                                                                                        | 17 (43)                | 14 (64)                     | 3 (17)               | <0.01          |
| Not having to remember to take a pill every day                                                                                                                     | 17 (43)                | 12 (55)                     | 5 (28)               | 0.09           |
| Easy to use                                                                                                                                                         | 17 (43)                | 9 (41)                      | 8 (44)               | 0.82           |
| Not carrying pills                                                                                                                                                  | 7 (18)                 | 1 (5)                       | 6 (33)               | 0.02           |
| Unable to feel it                                                                                                                                                   | 3 (8)                  | 0 (0)                       | 3 (17)               | 0.08           |
| Easy to keep private from my partner/others                                                                                                                         | 3 (8)                  | 0 (0)                       | 3 (17)               | 0.08           |
| Fewer side effects                                                                                                                                                  | 2 (5)                  | 2 (9)                       | 0 (0)                | 1              |
| Other (familiarity with contraceptive ring/internal condom)                                                                                                         | 2 (5)                  | 2 (9)                       | 0 (0)                | 0.30           |
| <i>For those who selected "Oral PrEP" or "Unsure": What characteristics about the ring make you not interested or unsure about switching?</i>                       |                        |                             |                      |                |
|                                                                                                                                                                     | <b>Overall (n=354)</b> | <b>South Africa (n=168)</b> | <b>Kenya (n=186)</b> | <b>p-value</b> |
| Insertion into vagina                                                                                                                                               | 228 (64)               | 138 (82)                    | 90 (48)              | <0.01          |
| Side effects                                                                                                                                                        | 97 (27)                | 36 (21)                     | 61 (33)              | 0.02           |
| Not enough safety data (i.e. afraid of impact on me)                                                                                                                | 89 (25)                | 39 (23)                     | 50 (27)              | 0.43           |
| User or partner may feel it                                                                                                                                         | 51 (14)                | 13 (8)                      | 38 (20)              | <0.01          |
| PrEP vaginal ring only reduces risk by 30%                                                                                                                          | 37 (10)                | 24 (14)                     | 13 (7)               | 0.03           |
| Worry about impact on having a healthy pregnancy due to PrEP                                                                                                        | 25 (7)                 | 5 (3)                       | 20 (11)              | <0.01          |



|                                                                                                                                                |        |        |         |       |
|------------------------------------------------------------------------------------------------------------------------------------------------|--------|--------|---------|-------|
| Worry about impact on baby's health after delivery due to being on PrEP while breastfeeding                                                    | 28 (8) | 6 (4)  | 22 (12) | <0.01 |
| Once a month                                                                                                                                   | 15 (4) | 3 (2)  | 12 (7)  | 0.03  |
| Other (e.g. reduced risk/discomfort with incorrect usage, comfort with pills, fear that ring is scented, general discomfort/mistrust, ashamed) | 14 (4) | 11 (7) | 3 (2)   | 0.02  |
